# Supplementary material for: Synthesis of Au@Ag@Cu trimetallic nanocrystals using three-step reduction
Source: Royal Society of Chemistry journal article supplement (doi:10.1039/c2ce26895g), 2012-11-27
Supplement: c2ce26895g.pdf [file c2ce26895g.pdf]

## Supplementary Information

### Synthesis of Au@Ag@Cu trimetallic nanocrystals using three-step reduction

**Masaharu Tsuji,<sup>\*a,b,c</sup> Mika Matsunaga,<sup>a</sup> Hisayo Kumagai,<sup>a</sup> Masatoshi Ogino,<sup>b</sup> Sachie Hikino,<sup>a</sup>  
Yuki Yoshida<sup>c</sup> and Toshitaka Ishizaki<sup>d</sup>**

<sup>a</sup> *Institute for Materials Chemistry and Engineering, Kyushu University, Kasuga, 816-8580, Japan*

<sup>b</sup> *Department of Applied Science for Electronics and Materials, Graduate School of Engineering Sciences,  
Kyushu University, Kasuga, 816-8580, Japan*

<sup>c</sup> *Department of Automotive Science, Graduate School of Integrated Frontier Sciences, Kyushu University,  
Kasuga, 816-8580, Japan*

<sup>d</sup> *Toyota Central R & D Labs., Inc., Nagakute, Aichi, 480-1192, Japan*

\*To whom correspondence should be addressed: E-mail: [tsuji@cm.kyushu-u.ac.jp](mailto:tsuji@cm.kyushu-u.ac.jp)

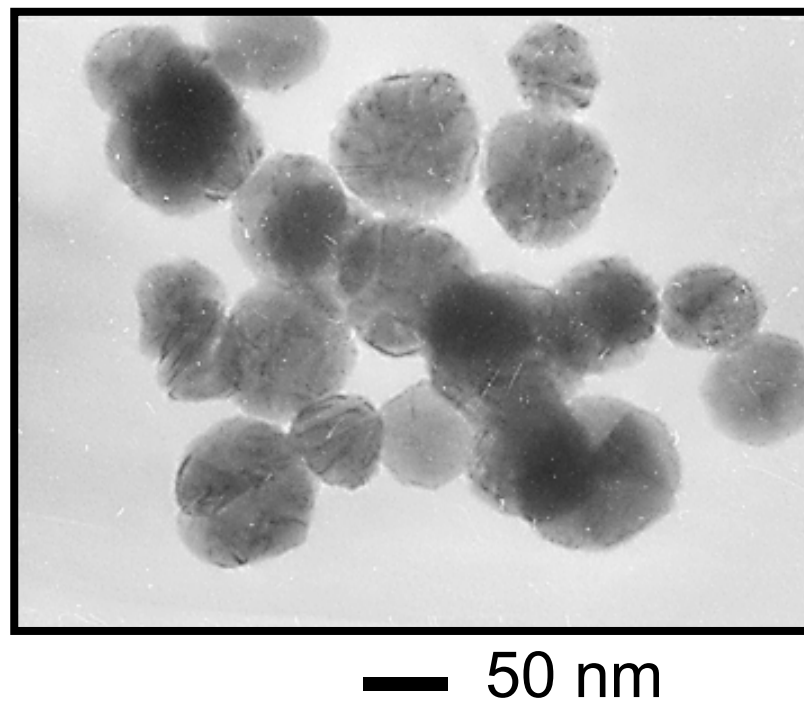

**Fig. S1.** Cu nanoparticles prepared from  $\text{Cu}(\text{OAc})_2 \cdot \text{H}_2\text{O}$ /PVP/EG solution under microwave irradiation for 15 min. Cu 3.8 mM and PVP 0.5 M.

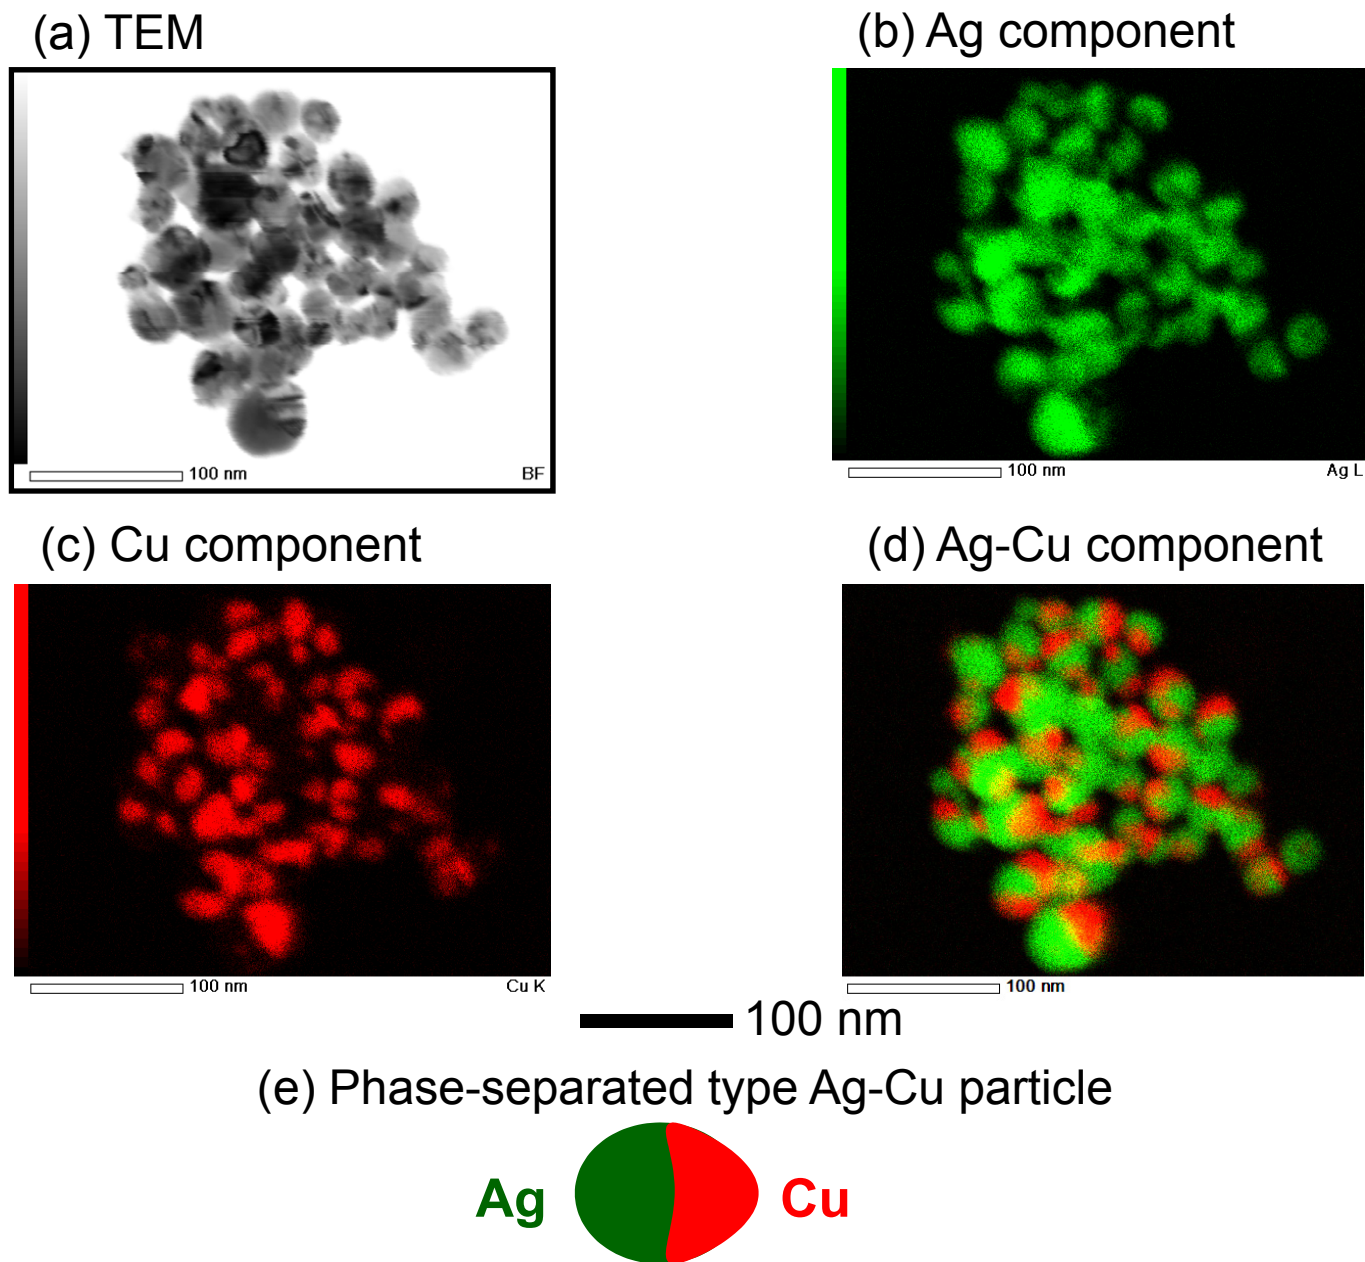

**Fig. S2.** Phase-separated type Ag-Cu particle prepared by the addition of  $\text{Cu}(\text{OAc})_2 \cdot \text{H}_2\text{O}$  to Ag seed solution.
